# Supplementary material for: The Impact of Socioeconomic Factors and Geriatric Syndromes on Frailty among Elderly People Receiving Home-Based Healthcare: A Cross-Sectional Study
Source: MDPI journal article supplement (doi:10.3390/healthcare10102079), 2022-10-19
Supplement: s1 [file s1]

## Supplementary

**Table S1:** The impact of socioeconomic factors and geriatric syndromes on frailty (n=301).

| <b>Logistic regression models</b>     |                           |               |                |                              |               |                |                              |               |                |
|---------------------------------------|---------------------------|---------------|----------------|------------------------------|---------------|----------------|------------------------------|---------------|----------------|
|                                       | <b>Univariable models</b> |               |                | <b>Multivariable model 1</b> |               |                | <b>Multivariable model 2</b> |               |                |
|                                       | <b>OR</b>                 | <b>95% CI</b> | <b>p-value</b> | <b>OR</b>                    | <b>95% CI</b> | <b>p-value</b> | <b>OR</b>                    | <b>95% CI</b> | <b>p-value</b> |
| <b>Cognitive function<sup>a</sup></b> |                           |               |                |                              |               |                |                              |               |                |
| (Moca)                                |                           |               |                |                              |               |                |                              |               |                |
| Dysfunction vs Normal (<26 vs ≥26)    | 3.06                      | 1.21-7.69     | 0.017          | 1.59                         | 0.58-4.34     | 0.357          | 1.65                         | 0.55-4.98     | 0.469          |
| <b>Depression (GDS)</b>               |                           |               |                |                              |               |                |                              |               |                |
| Mild vs Normal                        | 3.02                      | 1.75-5.22     | <0.001         | 2.16                         | 1.15-4.04     | 0.016          | 2.62                         | 1.33-5.17     | 0.005          |
| Severe vs Normal                      | 4.73                      | 2.28-9.80     | <0.001         | 2.33                         | 0.99-5.47     | 0.052          | 2.05                         | 0.80-5.24     | 0.134          |
| <b>Comorbidity<sup>b</sup> (CCI)</b>  |                           |               |                |                              |               |                |                              |               |                |
| Severe (CCI≥5) vs Mild                | 1.40                      | 0.82-2.39     | 0.213          | 1.25                         | 0.67-2.31     | 0.475          | 1.06                         | 0.49-2.27     | 0.876          |
| <b>Disability in ADL<sup>c</sup></b>  |                           |               |                |                              |               |                |                              |               |                |
| Barthel 11-15 vs Barthel 16-20        | 3.60                      | 1.52-8.50     | 0.003          | 1.83                         | 0.67-4.97     | 0.232          | 1.86                         | 0.65-5.34     | 0.247          |
| Barthel ≤10 vs Barthel 16-20          | 5.67                      | 1.97-16.29    | 0.001          | 1.89                         | 0.56-6.37     | 0.300          | 1.83                         | 0.52-6.37     | 0.340          |
| <b>Homebound status<sup>d</sup></b>   |                           |               |                |                              |               |                |                              |               |                |
| Semi-homebound vs Non-homebound       | 6.78                      | 3.26-14.11    | <0.001         | 4.55                         | 2.05-10.06    | <0.001         | 3.73                         | 1.58-8.76     | 0.003          |
| Homebound vs Non-homebound            | 6.08                      | 3.11-11.88    | <0.001         | 3.53                         | 1.60-7.78     | 0.002          | 2.60                         | 1.07-6.28     | 0.034          |
| <b>CVD<sup>*</sup></b>                |                           |               |                |                              |               |                |                              |               |                |
| Yes vs No                             | 1.42                      | 0.87-2.30     | 0.151          | -                            | -             | -              | 1.34                         | 0.67-2.69     | 0.400          |
| <b>Age (years)</b>                    |                           |               |                |                              |               |                |                              |               |                |
| ≥80 vs <80                            | 1.69                      | 1.04-2.73     | 0.032          | -                            | -             | -              | 1.15                         | 0.60-2.22     | 0.658          |
| <b>Gender</b>                         |                           |               |                |                              |               |                |                              |               |                |
| Men vs Women                          | 0.55                      | 0.33-0.924    | 0.024          | -                            | -             | -              | 1.01                         | 0.48-2.11     | 0.972          |
| <b>Annual individual Income</b>       |                           |               |                |                              |               |                |                              |               |                |
| >4500 vs <4500                        | 0.41                      | 0.25-0.68     | <0.001         | -                            | -             | -              | 0.45                         | 0.25-0.83     | 0.011          |
| <b>Smoking</b>                        |                           |               |                |                              |               |                |                              |               |                |
| Smoker vs Non Smoker                  | 0.41                      | 0.16-1.03     | 0.060          | -                            | -             | -              | 0.69                         | 0.20-2.41     | 0.568          |
| Ex-Smoker vs Non Smoker               | 1.04                      | 0.44-2.42     | 0.923          | -                            | -             | -              | 1.79                         | 0.55-5.79     | 0.329          |
| <b>Educational Level</b>              |                           |               |                |                              |               |                |                              |               |                |
| Highschool vs Uneducated              | 0.39                      | 0.17-0.91     | 0.030          | -                            | -             | -              | 0.55                         | 0.21-1.45     | 0.233          |
| Bachelor/MSc/PhD vs Uneducated        | 0.59                      | 0.22-1.61     | 0.310          | -                            | -             | -              | 1.12                         | 0.36-3.46     | 0.840          |

Notes: The impact of geriatric syndromes and socioeconomic factors on frailty taking into consideration possible confounding effects is examined in model 2 (Multivariate model), particularly multi-variate model 2 analysis after adjusting OR for CVD, age, gender, annual individual income, smoking, and educational level.

**Abbreviations:** OR, odds ratio. An OR>1 indicates a greater likelihood of elderly people having (Yes, Mild, Severe, VS. etc.) to be frail. Bars represent 95% Confidence Intervals (CI). <sup>a</sup>**Cognitive Function:** MoCA<26 is indicative of cognitive dysfunction; <sup>b</sup>**Comorbidity** refers to the mean values of the CCI index and not to the actual number of illnesses; <sup>c</sup>**Disability in ADL** refers to the level of functional independence in the domains of personal care and mobility on performing Activities of Daily Living (ADL). **Barthel ≤10** indicates that the person is dependent or “disabled”; <sup>d</sup>**Homebound status** refers to the ability of a person to leave of home during the last month due to its illnesses. Homebound (able to leave home at least once a week in the last month); Semi-homebound: (able to get home about 2 times a week with help), Non-homebound: (about 2 times a week but without help). **Abbreviations:** GDS, Geriatric Depression Scale; CCI, Charlson Comorbidity index; Barthel Scale -Activities of Daily Living. <sup>\*</sup>CVD: Cardiovascular disease.
